# Supplementary material for: Synthesis cost dictates the commercial viability of lead sulfide and perovskite quantum dot photovoltaics
Source: Royal Society of Chemistry journal article supplement (doi:10.1039/c8ee01348a), 2018-01-01
Supplement: c8ee01348a1.pdf [file c8ee01348a1.pdf]

## Electronic Supplementary Information (ESI) for

# Synthesis cost dictates the commercial viability of lead sulfide and perovskite quantum dot photovoltaics

Joel Jean<sup>1</sup>, Justin Xiao<sup>1</sup>, Robert Nick<sup>1</sup>, Nicole Moody<sup>2</sup>, Michel Nasilowski<sup>2</sup>, Mounqi Bawendi<sup>2</sup>, Vladimir Bulović<sup>1</sup>

<sup>1</sup> Department of Electrical Engineering and Computer Science, Massachusetts Institute of Technology, Cambridge, MA, USA

<sup>2</sup> Department of Chemistry, Massachusetts Institute of Technology, Cambridge, MA, USA

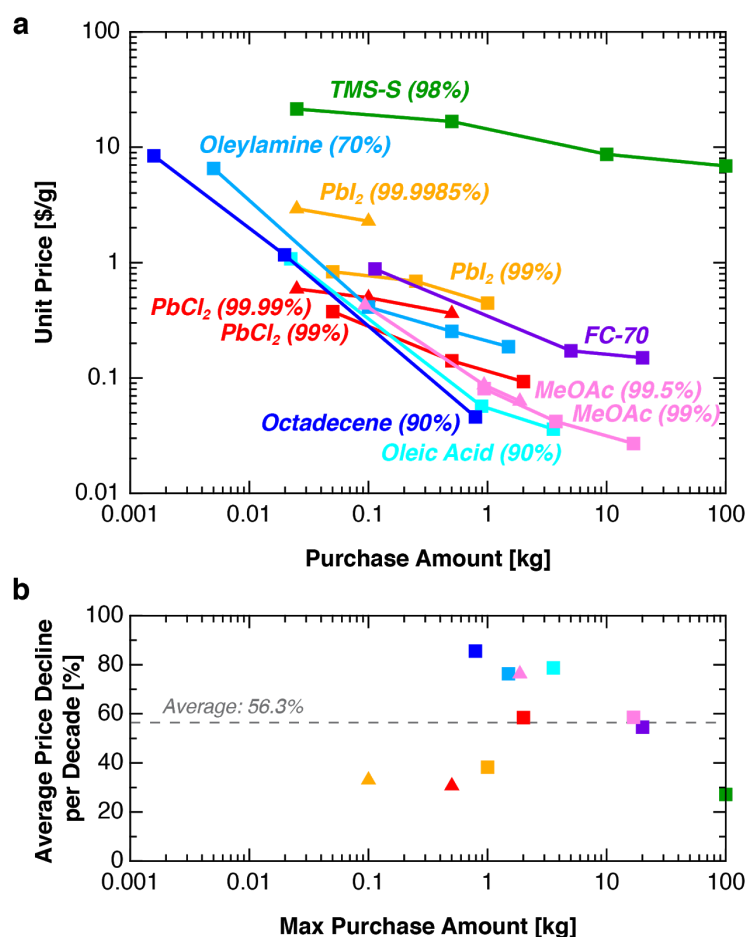

**Figure S1: Economies of scale in purchase of raw materials.** (a) Quoted price per gram at different purchase volumes for materials from leading commercial suppliers. Price reductions with increasing scale likely arise both from lower supplier profit margins and from lower unit costs with larger batch sizes. (b) Average reduction in price per gram for every 10× increase in purchase volume. The average price reduction across all materials shown is 56.3% per decade.

**Table S1: Summary of QD synthesis and ink preparation methods used in cost analysis.**

| QD Type | Strategy          | Precursor 1 | Precursor 2 | Reference      | Materials                                                                                                                                                                                                                                                                                                                                                           | Crashout                                                                                                                                                                                                                                                                                    | Reported Yield                                                                                                                             |
|---------|-------------------|-------------|-------------|----------------|---------------------------------------------------------------------------------------------------------------------------------------------------------------------------------------------------------------------------------------------------------------------------------------------------------------------------------------------------------------------|---------------------------------------------------------------------------------------------------------------------------------------------------------------------------------------------------------------------------------------------------------------------------------------------|--------------------------------------------------------------------------------------------------------------------------------------------|
| PbS     | Hot injection     | PbO         | TMS-S       | Pan 2013       | 0.9g PbO (99%), 3mL OA (tech grade 90%), 6mL ODE (tech grade 90%), 30mL ODE, 20mL FC-70, 360µL TMS-S (95%), 20mL ODE, 20mL FC-70                                                                                                                                                                                                                                    | Assumed Chang 2013 recipe                                                                                                                                                                                                                                                                   | 40-42mg/min = 2.4-2.5 g/h                                                                                                                  |
|         |                   |             |             | Yarema 2017    | 18g PbO, 70mL OA, 730mL ODE, 8.4mL TMS-S, 400mL ODE                                                                                                                                                                                                                                                                                                                 | Mix 1.2L growth solution with 0.6L hexane and 2.2L acetone and centrifuge, Redisperse in 0.75L hexane and precipitate with 0.75L acetone (3x)                                                                                                                                               | 17.2g PbS                                                                                                                                  |
|         |                   | PbO         | Thiourea    | Hendricks 2015 | 3mmol alkylamine in 2.5mL toluene, 3mmol alkyl or aryl isothiocyanate in 2.5mL toluene<br>10g PbO (99.999+%), 20mL ACN (99.5%), 0.7mL TFA (99%), 6.2mL TFAA (≥99%), 25.437g OA (99%), 180mL IPA (≥99.7%), 10.246g Et3N (≥99%), 900mL MeOH<br>8.812g Pb(oleate)2, 105.5g (147.5mL) 1-octene (99%), 1.742g N,N'-diphenylthiourea (98%), 5mL diglyme (99.5% anhydrous) | 6 total crashouts from toluene using methyl acetate: Growth solution + 40mL toluene + 120mL methyl acetate                                                                                                                                                                                  | 100% yield<br>31.1–32.8g Pb(oleate) 2 (90–95% yield) through lead trifluoroacetate route<br>2.67g (79.5%) yield of (PbS)(Pb(oleate)2) 0.26 |
|         |                   |             |             |                |                                                                                                                                                                                                                                                                                                                                                                     | 1 crashout after synthesis: 15:18:5 growth solution:acetone:butanol, 5:1 supernatant:acetone, Redisperse 1:1 in hexane<br>2 crashouts before device fab: 1:0:2: 0.8:1.5 crude:butanol:ethanol:acetone, Redisperse 1:1 in hexane                                                             | 3.7g PbS (estimated)                                                                                                                       |
|         |                   | PbAc        | TMS-S       | Chang 2013     | 11.38g PbAc, 21mL OA, 300mL ODE, 3.15 mL TMS-S, 150mL ODE                                                                                                                                                                                                                                                                                                           |                                                                                                                                                                                                                                                                                             |                                                                                                                                            |
|         |                   | PbCl2       | Sulfur      | Moreels 2011   | 0.024g Sulfur (99.999%), 2.25mL OLA (80-90%), 0.834g PbCl2 (99.999%), 7.5mL OLA, 170µL TOP (97%), 10mL toluene (quenching), 15mL EtOH (quenching)                                                                                                                                                                                                                   | Assumed Chang 2013 recipe                                                                                                                                                                                                                                                                   | 20–30% yield with TOP                                                                                                                      |
|         | Heat-up           | PbCl2       | TMS-S       | Zhang 2014     | 83.4g PbCl2 (99.999%), 600mL OLA (70% tech grade), 21mL TMS-S (synthesis grade), 20mL OLA                                                                                                                                                                                                                                                                           | Assumed Chang 2013 recipe                                                                                                                                                                                                                                                                   | 47.07g for large-scale synthesis (~50% yield for both Pb and S precursors at small scale, slightly lower at large scale)                   |
|         |                   |             | TAA         | Huang 2017     | 3 mmol PbCl2 (99.99%), 10mL OLA (80–90%), 1 mmol thioacetamide (TAA, ≥99%), 2mL OLA                                                                                                                                                                                                                                                                                 | Assumed Chang 2013 recipe                                                                                                                                                                                                                                                                   | 40x quantities for large-scale synthesis: 18g output (80% sulfur conversion)                                                               |
| CsPbI3  | Hot injection     | Cs2CO3      | PbI2        | Sanehira 2017  | Cs-oleate solution in ODE: 0.407g Cs2CO3 (SA, 99.9%), 1.25mL OA (SA, 90%), 20mL ODE (SA, 90%)<br><br>CsPbI3 QDs: 0.5g PbI2 (Alfa Aesar, 99.9985%), 25mL ODE, 2.5mL OA, 2.5mL OAm (SA, 70%), 2mL Cs-oleate solution (see above)                                                                                                                                      | 1st crashout: 35mL methyl acetate (MeOAc, SA, 99.5% anhydrous), 15mL QD reaction liquor, 5mL hexane<br>2nd crashout: 6.5mL MeOAc, 15mL hexane<br>Store in dark at 4°C for ≥24 hours to precipitate excess Cs-oleate and Pb-oleate<br>Remove solid precipitates by centrifugation before use |                                                                                                                                            |
| PbS Ink | Biphasic exchange | PbI2        | PbBr2       | Liu 2016       | 5mL of 10mg/mL PbS QD in octane, 230.5 mg PbI2 + 36.7mg PbBr2 + 15.4mg NH4Ac in 5mL DMF, Volume for octane rinse and toluene crashout unreported (5:2.7 DMF: toluene reported by Aqoma 2018), 0.25mL butylamine (resuspension)                                                                                                                                      |                                                                                                                                                                                                                                                                                             |                                                                                                                                            |
|         |                   |             | N/A         | Aqoma 2017     | 5mL of 15 mg/mL PbS QD in octane, 691mg PbI2 (Alfa Aesar, 99.99%) in 5mL DMF, Volume for octane rinse unreported, 0.5 mL butylamine (resuspension)                                                                                                                                                                                                                  |                                                                                                                                                                                                                                                                                             |                                                                                                                                            |

**Table S2: Cost breakdown for all QD synthesis and ink preparation methods analyzed.**

|                                   |                | QD Synthesis      |                   |               |               |                |          |                   |                                 | Ink Preparation  |                   |  |
|-----------------------------------|----------------|-------------------|-------------------|---------------|---------------|----------------|----------|-------------------|---------------------------------|------------------|-------------------|--|
|                                   | QD Type        | PbS               |                   |               |               |                |          |                   | CsPbI <sub>3</sub>              | PbS              |                   |  |
|                                   | Precursor 1    | PbCl <sub>2</sub> | PbCl <sub>2</sub> | PbO           | PbAc          | PbO            | PbO      | PbCl <sub>2</sub> | Cs <sub>2</sub> CO <sub>3</sub> | PbI <sub>2</sub> | PbI <sub>2</sub>  |  |
|                                   | Precursor 2    | TAA               | TMS-S             | TMS-S         | TMS-S         | Thiourea       | TMS-S    | Sulfur            | PbI <sub>2</sub>                |                  | PbBr <sub>2</sub> |  |
|                                   | Method         | Heat up           | Heat up           | Hot injection | Hot injection | Hot injection  | Flow     | Hot injection     | Hot injection                   | Phase transfer   | Phase transfer    |  |
|                                   | Reference      | Huang 2017        | Zhang 2014        | Yarema 2017   | Chang 2013    | Hendricks 2015 | Pan 2013 | Moreels 2011      | Sanehira 2017                   | Aqoma 2017       | Liu 2016          |  |
| \$/g                              | TOTAL          | 10.6              | 10.7              | 17.4          | 26.6          | 32.3           | 35.7     | 59.2              | 72.7                            | 6.3              | 8.7               |  |
|                                   | Sum of Medians | 7.6               | 7.8               | 14.5          | 23.6          | 29.2           | 32.7     | 56.1              | 69.0                            | 5.2              | 7.7               |  |
|                                   | Materials      | 3.2               | 4.7               | 5.3           | 9.3           | 8.7            | 13.7     | 21.5              | 17.5                            | 3.7              | 5.4               |  |
|                                   | Labor          | 3.5               | 2.0               | 7.5           | 11.8          | 17.5           | 15.6     | 29.0              | 44.7                            | 1.5              | 2.2               |  |
|                                   | CapEx          | 0.1               | 0.0               | 0.1           | 0.2           | 0.3            | 0.3      | 0.5               | 0.7                             | 0.0              | 0.1               |  |
|                                   | OpEx           | 0.0               | 0.0               | 0.0           | 0.1           | 0.1            | 0.1      | 0.1               | 0.2                             | 0.0              | 0.0               |  |
|                                   | Yield Loss     | 0.9               | 0.9               | 1.5           | 2.3           | 2.7            | 3.1      | 5.1               | 5.9                             | 0.0              | 0.0               |  |
| \$/m <sup>2</sup><br>(500nm film) | TOTAL          | 28.6              | 29.0              | 47.2          | 72.0          | 87.4           | 96.7     | 160.1             | 139.7                           | 17.0             | 23.6              |  |
|                                   | Sum of Medians | 20.6              | 21.0              | 39.2          | 63.7          | 78.9           | 88.6     | 151.9             | 132.6                           | 14.1             | 20.8              |  |
|                                   | Materials      | 8.7               | 12.8              | 14.5          | 25.1          | 23.4           | 37.0     | 58.1              | 33.6                            | 10.0             | 14.7              |  |
|                                   | Labor          | 9.4               | 5.5               | 20.4          | 31.8          | 47.3           | 42.2     | 78.4              | 85.9                            | 4.0              | 6.0               |  |
|                                   | CapEx          | 0.2               | 0.1               | 0.3           | 0.5           | 0.8            | 0.7      | 1.3               | 1.4                             | 0.1              | 0.1               |  |
|                                   | OpEx           | 0.0               | 0.0               | 0.1           | 0.1           | 0.2            | 0.2      | 0.3               | 0.4                             | 0.0              | 0.0               |  |
|                                   | Yield Loss     | 2.4               | 2.6               | 4.0           | 6.1           | 7.2            | 8.4      | 13.8              | 11.4                            | 0.0              | 0.0               |  |
| \$/W<br>(19% PCE)                 | TOTAL          | 0.15              | 0.15              | 0.25          | 0.38          | 0.46           | 0.51     | 0.84              | 0.74                            | 0.09             | 0.12              |  |
|                                   | Sum of Medians | 0.11              | 0.11              | 0.21          | 0.34          | 0.42           | 0.47     | 0.80              | 0.70                            | 0.07             | 0.11              |  |
|                                   | Materials      | 0.05              | 0.07              | 0.08          | 0.13          | 0.12           | 0.19     | 0.31              | 0.18                            | 0.05             | 0.08              |  |
|                                   | Labor          | 0.05              | 0.03              | 0.11          | 0.17          | 0.25           | 0.22     | 0.41              | 0.45                            | 0.02             | 0.03              |  |
|                                   | CapEx          | 0.00              | 0.00              | 0.00          | 0.00          | 0.00           | 0.00     | 0.01              | 0.01                            | 0.00             | 0.00              |  |
|                                   | OpEx           | 0.00              | 0.00              | 0.00          | 0.00          | 0.00           | 0.00     | 0.00              | 0.00                            | 0.00             | 0.00              |  |
|                                   | Yield Loss     | 0.01              | 0.01              | 0.02          | 0.03          | 0.04           | 0.04     | 0.07              | 0.06                            | 0.00             | 0.00              |  |

**Table S3: Cost breakdown by process step for QD synthesis and ink preparation methods.**

|               |             | QD Synthesis      |                   |               |               |                |          |                   |                                 | Ink Preparation   |                  |
|---------------|-------------|-------------------|-------------------|---------------|---------------|----------------|----------|-------------------|---------------------------------|-------------------|------------------|
|               | QD Type     | PbS               |                   |               |               |                |          |                   | CsPbI <sub>3</sub>              | PbS               |                  |
|               | Precursor 1 | PbCl <sub>2</sub> | PbCl <sub>2</sub> | PbO           | PbAc          | PbO            | PbO      | PbCl <sub>2</sub> | Cs <sub>2</sub> CO <sub>3</sub> | PbI <sub>2</sub>  | PbI <sub>2</sub> |
|               | Precursor 2 | TAA               | TMS-S             | TMS-S         | TMS-S         | Thiourea       | TMS-S    | Sulfur            | PbI <sub>2</sub>                | PbBr <sub>2</sub> |                  |
|               | Method      | Heat up           | Heat up           | Hot injection | Hot injection | Hot injection  | Flow     | Hot injection     | Hot injection                   | Phase transfer    | Phase transfer   |
|               | Reference   | Huang 2017        | Zhang 2014        | Yarema 2017   | Chang 2013    | Hendricks 2015 | Pan 2013 | Moreels 2011      | Sanehira 2017                   | Aqoma 2017        | Liu 2016         |
| Synthesis     | SUM [\$ /g] | 2.1206            | 4.3971            | 5.8039        | 9.2961        | 11.9388        | 14.7553  | 19.6929           | 21.5933                         | 5.2038            | 7.6957           |
|               | Materials   | 0.9829            | 3.7377            | 3.3072        | 5.5100        | 6.1716         | 9.6559   | 11.0275           | 6.8348                          | 3.6835            | 5.4180           |
|               | Capex       | 0.0276            | 0.0159            | 0.0604        | 0.0929        | 0.1395         | 0.1243   | 0.2093            | 0.3554                          | 0.0369            | 0.0547           |
|               | Labor       | 1.1029            | 0.6394            | 2.4206        | 3.6693        | 5.5914         | 4.9428   | 8.4015            | 14.3110                         | 1.4739            | 2.2088           |
|               | Opex        | 0.0072            | 0.0042            | 0.0157        | 0.0240        | 0.0363         | 0.0324   | 0.0546            | 0.0920                          | 0.0095            | 0.0141           |
|               | Yield loss  | 0.0000            | 0.0000            | 0.0000        | 0.0000        | 0.0000         | 0.0000   | 0.0000            | 0.0000                          | 0.0000            | 0.0000           |
| Crashout      | SUM [\$ /g] | 4.2057            | 2.6074            | 5.9714        | 9.7145        | 10.6651        | 12.0918  | 23.6665           | 30.7454                         |                   |                  |
|               | Materials   | 2.1726            | 0.9930            | 2.0050        | 3.6590        | 2.2526         | 3.9025   | 10.0264           | 10.2913                         |                   |                  |
|               | Capex       | 0.0276            | 0.0161            | 0.0606        | 0.0923        | 0.1384         | 0.1235   | 0.2098            | 0.3543                          |                   |                  |
|               | Labor       | 1.1079            | 0.6455            | 2.4113        | 3.6721        | 5.5658         | 4.9119   | 8.2754            | 14.0931                         |                   |                  |
|               | Opex        | 0.0072            | 0.0042            | 0.0157        | 0.0240        | 0.0359         | 0.0321   | 0.0542            | 0.0918                          |                   |                  |
|               | Yield loss  | 0.8903            | 0.9485            | 1.4787        | 2.2671        | 2.6724         | 3.1219   | 5.1007            | 5.9148                          |                   |                  |
| Cleaning      | SUM [\$ /g] | 1.1267            | 0.6466            | 2.4530        | 3.7978        | 5.7799         | 5.1273   | 8.8535            | 14.5769                         |                   |                  |
|               | Materials   | 0.0263            | 0.0117            | 0.0420        | 0.1121        | 0.2318         | 0.1436   | 0.3629            | 0.3384                          |                   |                  |
|               | Capex       | 0.0000            | 0.0000            | 0.0000        | 0.0000        | 0.0000         | 0.0000   | 0.0000            | 0.0000                          |                   |                  |
|               | Labor       | 1.1004            | 0.6349            | 2.4110        | 3.6858        | 5.5481         | 4.9837   | 8.4906            | 14.2385                         |                   |                  |
|               | Opex        | 0.0000            | 0.0000            | 0.0000        | 0.0000        | 0.0000         | 0.0000   | 0.0000            | 0.0000                          |                   |                  |
|               | Yield loss  | 0.0000            | 0.0000            | 0.0000        | 0.0000        | 0.0000         | 0.0000   | 0.0000            | 0.0000                          |                   |                  |
| TOTAL [\$ /g] |             | 7.5               | 7.7               | 14.2          | 22.8          | 28.4           | 32.0     | 52.2              | 66.9                            | 5.2               | 7.7              |

**Table S4: Cost breakdown for roll-to-roll manufacturing of QD and perovskite PV modules.**

|                           | Absorber              | MAPbI <sub>3</sub> | PbS QD       | CsPbI <sub>3</sub> QD |
|---------------------------|-----------------------|--------------------|--------------|-----------------------|
| <b>\$/m<sup>2</sup></b>   | <b>TOTAL</b>          | <b>128.4</b>       | <b>178.6</b> | <b>306.6</b>          |
|                           | <i>Sum of Medians</i> | <i>111.1</i>       | <i>162.6</i> | <i>290.7</i>          |
|                           | <b>Materials</b>      | 64.5               | 111.2        | 225.4                 |
|                           | <b>Labor</b>          | 4.5                | 4.4          | 4.4                   |
|                           | <b>CapEx</b>          | 22.0               | 21.8         | 21.8                  |
|                           | <b>OpEx</b>           | 12.1               | 11.8         | 11.8                  |
|                           | <b>Yield Loss</b>     | 8.1                | 13.3         | 27.3                  |
| <b>\$/W<br/>(19% PCE)</b> | <b>TOTAL</b>          | <b>0.68</b>        | <b>0.94</b>  | <b>1.61</b>           |
|                           | <i>Sum of Medians</i> | <i>0.59</i>        | <i>0.86</i>  | <i>1.53</i>           |
|                           | <b>Materials</b>      | 0.34               | 0.59         | 1.19                  |
|                           | <b>Labor</b>          | 0.02               | 0.02         | 0.02                  |
|                           | <b>CapEx</b>          | 0.12               | 0.12         | 0.12                  |
|                           | <b>OpEx</b>           | 0.06               | 0.06         | 0.06                  |
|                           | <b>Yield Loss</b>     | 0.04               | 0.07         | 0.14                  |
