# Supplementary material for: Synthesis cost dictates the commercial viability of lead sulfide and perovskite quantum dot photovoltaics
Source: Royal Society of Chemistry journal article supplement (doi:10.1039/c8ee01348a), 2018-01-01
Supplement: c8ee01348a2.zip [file c8ee01348a2.zip]

## Sheet: Materials
Material	Process	Nominal Usage (Unit/m^2)	Nominal Cost ($/Unit)	Low Usage (Unit/m^2)	Low Cost ($/Unit)	High Usage (Unit/m^2)	High Cost ($/Unit)	Unit	Notes	Density [g/cm3]	Thickness nominal [nm]	Mass per area nominal [g/m2]	Nominal material usage [unit/mL ink]	Precursor MW [g/mol]	Limiting element MW [g/mol]	Limiting element concentration [g/mL ink]	Film thickness [nm]	Film density [g/cm3]	Film area density [g/m2]	Film MW [g/mol]	Limiting element usage per area [g/m2]	Ink volume per area [mL/m2]	Material usage per area [unit/m2]
PET	PET receipt	1	0.276	1	0.138	1	0.69	m2	1–5 $/kg on Alibaba ($1/2/5 L/N/H)	1.38	100000	138
N/A	Web clean	0	0	0	0	0	0
IZO	IZO sputter	1.4046	2.65	1.4046	0.265	1.4046	2.65	g	Nominal cost from Lesker (small target)	7.023	200	1.4046
N/A	P1 scribe	0	0	0	0	0	0
Titanium ethoxide	TiO2 slot die	0.604078	0.432	0.604078	0.0432	0.604078	0.432	g		1.088			0.807921	228.11	47.867	0.169536	50	4.23	0.2115	79.866	0.126761	0.747694	0.604078
Ethanol	TiO2 slot die	0.00740291	0.02045	0.00740291	0.002045	0.00740291	0.02045	mL		0.789			0.00990099									0.747694	0.00740291
N/A	TiO2 flash anneal	0	0	0	0	0	0
CsPbI3 QD ink	CsPbI3 QD slot die	12.8067	11.85	12.8067	6.36	12.8067	23.34	mL	Assume ink prep costs same per gram as for PbS QDs, 150mg/mL ink								500	3.842	1.921			12.8067
Nickel formate	NiOx slot die	0.329996	0.2225	0.329996	0.02225	0.329996	0.2225	g	Nominal from Steirer 2015	2.15			0.0919963	184.77	58.6934	0.0292232	20	6.67	0.1334	74.6928	0.104825	3.58706	0.329996
Ethylene glycol	NiOx slot die	3.29996	0.022755	3.29996	0.0022755	3.29996	0.022755	mL	Nominal from Steirer 2015	1.11			0.919963									3.58706	3.29996
Ethylenediamine	NiOx slot die	0.287096	0.03764	0.287096	0.003764	0.287096	0.03764	mL	Nominal from Steirer 2015	0.899			0.0800368									3.58706	0.287096
N/A	NiOx flash anneal	0	0	0	0	0	0
N/A	P2 scribe	0	0	0	0	0	0
Al	Al sputter	0.54	1.44	0.54	0.144	0.54	1.44	g	Nominal cost from Lesker (small target)	2.7	200	0.54
N/A	P3 scribe	0	0	0	0	0	0
Barrier films	Encapsulate	2	25	2	5	2	40	m2
Adhesive	Encapsulate	3	0.164	2.5	0.074	3.5	0.351	g	From Chang 2018
Contact buttons	Cut and contact	13.1	0.1	13.1	0.05	13.1	0.2	pair	From Chang 2018
Junction box	Jbox install	1	8.5	0.5	5	2	12	m2	Calculated from NREL 2013 CdTe analysis
N/A	Module test	0	0	0	0	0	0

## Sheet: Tools
Tool	Nominal	Low	High	Units	Notes
N/A	PET receipt
Tool Cost	0	0	0	$M
Facility Cost	0	0	0	% of tool cost
Floor Space	0	0	0	m^2
Spare Parts	0	0	0	% capex/yr
Electricity Usage	0	0	0	kW
Throughput	0	0	0	m^2/h
Down Time	0	0	0	%
Operation Staff	0	0	0	Number of staff
Maintenance Staff	0	0	0	Number of staff
Yield	99.5	99	100	% of good parts produced
Web cleaner	Web clean			Assume similar to Chang 2018 Web cutter parameters
Tool Cost	0.029	0.022	0.037	$M
Facility Cost	2	1	3	% of tool cost
Floor Space	5	4	8	m^2
Spare Parts	3	2	4	% capex/yr
Electricity Usage	10	5	20	kW
Throughput	4	3	5	m^2/h
Down Time	2	1	3	%
Operation Staff	0.02	0.01	0.04	Number of staff
Maintenance Staff	2	1	3	Number of staff
Yield	99.5	99	100	% of good parts produced
Sputterer	IZO sputter
Tool Cost	10	8	12	$M	Sofia 2018
Facility Cost	25	20	30	% of tool cost	Sofia 2018
Floor Space	25	20	30	m^2	Song 2017
Spare Parts	4	3.2	4.8	% capex/yr	Sofia 2018
Electricity Usage	500	400	600	kW	Song 2017
Throughput	98	78.4	117.6	m^2/h	Sofia 2018
Down Time	3	2	5	%	Sofia 2018
Operation Staff	0.25	0.2	0.5	Number of staff	Chang 2017
Maintenance Staff	2	1	3	Number of staff	Chang 2017
Yield	98	95	100	% of good parts produced
Laser scriber	P1 scribe
Tool Cost	0.8	0.64	0.96	$M	Sofia 2018
Facility Cost	25	20	30	% of tool cost	Sofia 2018
Floor Space	15	12	18	m^2	Song 2017
Spare Parts	4	3.2	4.8	% capex/yr	Sofia 2018
Electricity Usage	2	1.6	2.4	kW	Song 2017
Throughput	52	41.6	62.4	m^2/h	Sofia 2018
Down Time	2	1	10	%	Chang 2017
Operation Staff	0.25	0.2	0.5	Number of staff	Chang 2017
Maintenance Staff	2	1	3	Number of staff	Chang 2017
Yield	99	98	100	% of good parts produced
Slot die coater	TiO2 slot die
Tool Cost	0.632	0.441	0.864	$M	Chang 2018
Facility Cost	30	20	40	% of tool cost	Chang 2018
Floor Space	30	20	40	m^2	Chang 2018
Spare Parts	10	5	15	% capex/yr	Chang 2018
Electricity Usage	40	20	60	kW	Chang 2018
Throughput	18	18	18	m^2/h	Chang 2018
Down Time	10	5	20	%	Chang 2018
Operation Staff	0.5	0.25	1	Number of staff	Chang 2018
Maintenance Staff	2	1	3	Number of staff	Chang 2018
Yield	98	95	100	% of good parts produced	Chang 2018
Flash annealing tool	TiO2 flash anneal
Tool Cost	0.25	0.2	1	$M	3x Pulseforge 1200, since it has 3x the throughput capability
Facility Cost	25	20	30	% of tool cost
Floor Space	10	5	20	m^2
Spare Parts	3	2	4	% capex/yr
Electricity Usage	100	50	200	kW
Throughput	100	80	120	m^2/h	Assuming 1m wide cell
Down Time	2	1	10	%
Operation Staff	0.25	0.2	0.5	Number of staff
Maintenance Staff	2	1	3	Number of staff	Chang 2017
Yield	99	98	100	% of good parts produced
Slot die coater	CsPbI3 QD slot die
Tool Cost	0.632	0.441	0.864	$M	Chang 2018
Facility Cost	30	20	40	% of tool cost	Chang 2018
Floor Space	30	20	40	m^2	Chang 2018
Spare Parts	10	5	15	% capex/yr	Chang 2018
Electricity Usage	40	20	60	kW	Chang 2018
Throughput	18	18	18	m^2/h	Chang 2018
Down Time	10	5	20	%	Chang 2018
Operation Staff	0.5	0.25	1	Number of staff	Chang 2018
Maintenance Staff	2	1	3	Number of staff	Chang 2018
Yield	98	95	100	% of good parts produced	Chang 2018
Slot die coater	NiOx slot die
Tool Cost	0.632	0.441	0.864	$M	Chang 2018
Facility Cost	30	20	40	% of tool cost	Chang 2018
Floor Space	30	20	40	m^2	Chang 2018
Spare Parts	10	5	15	% capex/yr	Chang 2018
Electricity Usage	40	20	60	kW	Chang 2018
Throughput	18	18	18	m^2/h	Chang 2018
Down Time	10	5	20	%	Chang 2018
Operation Staff	0.5	0.25	1	Number of staff	Chang 2018
Maintenance Staff	2	1	3	Number of staff	Chang 2018
Yield	98	95	100	% of good parts produced	Chang 2018
Flash annealing tool	NiOx flash anneal
Tool Cost	0.25	0.2	1	$M	3x Pulseforge 1200, since it has 3x the throughput capability
Facility Cost	25	20	30	% of tool cost
Floor Space	10	5	20	m^2
Spare Parts	3	2	4	% capex/yr
Electricity Usage	100	50	200	kW
Throughput	100	80	120	m^2/h	Assuming 1m wide cell
Down Time	2	1	10	%
Operation Staff	0.25	0.2	0.5	Number of staff
Maintenance Staff	2	1	3	Number of staff	Chang 2017
Yield	99	98	100	% of good parts produced
Laser scriber	P2 scribe
Tool Cost	0.8	0.64	0.96	$M	Sofia 2018
Facility Cost	25	20	30	% of tool cost	Sofia 2018
Floor Space	15	12	18	m^2	Song 2017
Spare Parts	4	3.2	4.8	% capex/yr	Sofia 2018
Electricity Usage	2	1.6	2.4	kW	Song 2017
Throughput	52	41.6	62.4	m^2/h	Sofia 2018
Down Time	2	1	10	%	Chang 2017
Operation Staff	0.25	0.2	0.5	Number of staff	Chang 2017
Maintenance Staff	2	1	3	Number of staff	Chang 2017
Yield	99	98	100	% of good parts produced
Sputterer	Al sputter
Tool Cost	12	9.6	14.4	$M	Sofia 2018
Facility Cost	25	20	30	% of tool cost	Sofia 2018
Floor Space	12.5	10	15	m^2	Song 2017
Spare Parts	4	3.2	4.8	% capex/yr	Sofia 2018
Electricity Usage	80	64	96	kW	Song 2017
Throughput	98	78.4	117.6	m^2/h	Sofia 2018
Down Time	3	2	5	%	Sofia 2018
Operation Staff	0.25	0.2	0.5	Number of staff	Chang 2017
Maintenance Staff	2	1	3	Number of staff	Chang 2017
Yield	98	95	100	% of good parts produced
Laser scriber	P3 scribe
Tool Cost	0.8	0.64	0.96	$M	Sofia 2018
Facility Cost	25	20	30	% of tool cost	Sofia 2018
Floor Space	15	12	18	m^2	Song 2017
Spare Parts	4	3.2	4.8	% capex/yr	Sofia 2018
Electricity Usage	2	1.6	2.4	kW	Song 2017
Throughput	52	41.6	62.4	m^2/h	Sofia 2018
Down Time	2	1	10	%	Chang 2017
Operation Staff	0.25	0.2	0.5	Number of staff	Chang 2017
Maintenance Staff	2	1	3	Number of staff	Chang 2017
Yield	99	98	100	% of good parts produced
Laminator	Encapsulate
Tool Cost	1.95768	1.56615	2.34922	$M	Sofia 2018
Facility Cost	25	20	30	% of tool cost	Sofia 2018
Floor Space	15	12	18	m^2	Song 2017
Spare Parts	4	3.2	4.8	% capex/yr	Sofia 2018
Electricity Usage	35	28	42	kW	Sofia 2018
Throughput	67.2	53.76	80.64	m^2/h	Sofia 2018
Down Time	2	1	5	%	Chang 2017
Operation Staff	0.02	0.01	0.04	Number of staff	Chang 2018
Maintenance Staff	2	1	3	Number of staff	Chang 2017
Yield	99.5	99	100	% of good parts produced
Sheet and pin tool	Cut and contact
Tool Cost	0.029	0.022	0.037	$M	Chang 2018
Facility Cost	2	1	3	% of tool cost	Chang 2018
Floor Space	5	4	8	m^2	Chang 2018
Spare Parts	4	2	8	% capex/yr	Chang 2018
Electricity Usage	10	5	20	kW	Chang 2018
Throughput	4	3	5	m^2/h	Chang 2018
Down Time	2	1	3	%	Chang 2018
Operation Staff	0.02	0.01	0.04	Number of staff	Chang 2018
Maintenance Staff	2	1	3	Number of staff	Chang 2017
Yield	99.5	99	100	% of good parts produced
J-box tool	Jbox install
Tool Cost	0.504462	0.40357	0.605355	$M	Sofia 2018
Facility Cost	25	20	30	% of tool cost	Sofia 2018
Floor Space	2.5	2	3	m^2	Song 2017
Spare Parts	4	3.2	4.8	% capex/yr	Sofia 2018
Electricity Usage	0.5	0.4	0.6	kW	Sofia 2018
Throughput	67.2	53.76	80.64	m^2/h	Sofia 2018
Down Time	2	1	3	%	Chang 2018
Operation Staff	0.02	0.01	0.04	Number of staff	Chang 2018
Maintenance Staff	2	1	3	Number of staff	Chang 2018
Yield	99.5	99	100	% of good parts produced
Module tester	Module test
Tool Cost	1.65648	1.32518	1.98777	$M	Sofia 2018
Facility Cost	25	20	30	% of tool cost	Sofia 2018
Floor Space	2.5	2	3	m^2	Song 2017
Spare Parts	4	3.2	4.8	% capex/yr	Sofia 2018
Electricity Usage	0.5	0.4	0.6	kW	Sofia 2018
Throughput	67.2	53.76	80.64	m^2/h	Sofia 2018
Down Time	5	3	8	%	Chang 2018
Operation Staff	0.02	0.01	0.04	Number of staff	Chang 2018
Maintenance Staff	2	1	3	Number of staff	Chang 2018
Yield	99.5	99	100	% of good parts produced

## Sheet: Factory Assumptions
Factory Assumption	Nominal Value	Low Value	High Value	Description	Notes
Electricity Cost	0.07	0.05	0.13	cost for electricity [$/kWh]	March 2018 average industrial electricity prices for different U.S. regions	https://www.eia.gov/electricity/monthly/epm_table_grapher.php?t=epmt_5_6_a
Electricity for Services	1	1	1	ratio of electricity for services/electricity	From Chang 2018
Floor Space Ratio	3	2	5	ratio of total factory floor space/tool footprint	Nominal value from Chang 2018
Building Cost	1000	200	1500	cost of building [$/m^2]	1000$/m2 estimate from Chang 2018
Operator Labor Rate	20	15	25	operator labor rate [$/hr]	U.S. median rates for system operators in semiconductor manufacturing	https://www.bls.gov/oes/current/naics4_334400.htm
Maintenance Technician Labor Rate	25	20	30	maintenance technician labor rate [$/hr]	U.S. median rates for maintenance technicians in semiconductor manufacturing	https://www.bls.gov/oes/current/naics4_334400.htm
Indirect Labor Cost Ratio	0.1	0.1	0.1	ratio of indirect labor/direct labor	From Chang 2018
Facilities Depreciation Time	15	15	39	depreciation time for building [yr]	39 years is typical for U.S. buildings, 15 years for qualified improvement property (changes made to an interior portion of a building which is nonresidential real property, and placed in service after the date the building is first placed in service)	http://www.ey.com/Publication/vwLUAssets/Worldwide_Capital_and_Fixed_Assets_Guide_2016/$FILE/Worldwide%20Capital%20and%20Fixed%20Assets%20Guide%202016.pdf
Equipment Depreciation Time	7	7	7	depreciation time for equipment and facilities [yr]
Cell PCE	20	15	25	cell active area power conversion efficiency [%]
GFF	0.95	0.8	0.95	Module geometric fill factor
Number of Operating Hours	3690	2630	6130	number of hours factory operates per year (utilization)	3690hr (42% utilization) in Chang 2018
